RESEARCH ARTICLE

# Portrayals of mental illness, treatment, and relapse and their effects on the stigma of mental illness: Population-based, randomized survey experiment in rural Uganda

Justin D. Rasmussen<sup>1,2\*</sup>, Bernard Kakuhiire<sup>3</sup>, Charles Baguma<sup>3</sup>, Scholastic Ashaba<sup>3</sup>, Christine E. Cooper-Vince<sup>4</sup>, Jessica M. Perkins<sup>5</sup>, David R. Bangsberg<sup>3,6</sup>, Alexander C. Tsai<sup>1,3,7</sup>

**1** Massachusetts General Hospital, Boston, Massachusetts, United States of America, **2** Duke University, Durham, North Carolina, United States of America, **3** Mbarara University of Science and Technology, Mbarara, Uganda, **4** University of Geneva, Geneva, Switzerland, **5** Peabody College, Vanderbilt University, Nashville, Tennessee, United States of America, **6** Oregon Health Sciences University—Portland State University School of Public Health, Portland, Oregon, United States of America, **7** Harvard Medical School, Boston, Massachusetts, United States of America

\* [justin.rasmussen@duke.edu](mailto:justin.rasmussen@duke.edu)

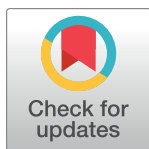

**OPEN ACCESS**

**Citation:** Rasmussen JD, Kakuhiire B, Baguma C, Ashaba S, Cooper-Vince CE, Perkins JM, et al. (2019) Portrayals of mental illness, treatment, and relapse and their effects on the stigma of mental illness: Population-based, randomized survey experiment in rural Uganda. *PLoS Med* 16(9): e1002908. <https://doi.org/10.1371/journal.pmed.1002908>

**Academic Editor:** Charlotte Hanlon, Addis Ababa University / King's College London, ETHIOPIA

**Received:** February 2, 2019

**Accepted:** August 20, 2019

**Published:** September 20, 2019

**Copyright:** © 2019 Rasmussen et al. This is an open access article distributed under the terms of the [Creative Commons Attribution License](https://creativecommons.org/licenses/by/4.0/), which permits unrestricted use, distribution, and reproduction in any medium, provided the original author and source are credited.

**Data Availability Statement:** All files are available from the following GitHub repository: [https://github.com/jdrasmus1/mistigma\\_paper](https://github.com/jdrasmus1/mistigma_paper)

**Funding:** This project was funded by Friends of a Healthy Uganda and US National Institutes of Health R01MH113494-01 ([https://projectreporter.nih.gov/project\\_info\\_description.cfm?aid=9507908&icde=43069576&ddparam=&ddvalue=&ddsub=&cr=1&csb=default&cs=ASC&pbll=](https://projectreporter.nih.gov/project_info_description.cfm?aid=9507908&icde=43069576&ddparam=&ddvalue=&ddsub=&cr=1&csb=default&cs=ASC&pbll=))

## Abstract

### Background

Mental illness stigma is a fundamental barrier to improving mental health worldwide, but little is known about how to durably reduce it. Understanding of mental illness as a treatable medical condition may influence stigmatizing beliefs, but available evidence to inform this hypothesis has been derived solely from high-income countries. We embedded a randomized survey experiment within a whole-population cohort study in rural southwestern Uganda to assess the extent to which portrayals of mental illness treatment effectiveness influence personal beliefs and perceived norms about mental illness and about persons with mental illness.

### Methods and findings

Study participants were randomly assigned to receive a vignette describing a typical woman (control condition) or one of nine variants describing a different symptom presentation (suggestive of schizophrenia, bipolar, or major depression) and treatment course (no treatment, treatment with remission, or treatment with remission followed by subsequent relapse). Participants then answered questions about personal beliefs and perceived norms in three domains of stigma: willingness to have the woman marry into their family, belief that she is receiving divine punishment, and belief that she brings shame on her family. We used multi-variable Poisson and ordered logit regression models to estimate the causal effect of vignette treatment assignment on each stigma-related outcome. Of the participants randomized, 1,355 were successfully interviewed (76%) from November 2016 to June 2018. Roughly half of respondents were women (56%), half had completed primary school (57%),

awarded to ACT. The content is solely the responsibility of the authors and does not necessarily represent the official view of the US National Institutes of Health, Harvard University, or its affiliated academic healthcare centers. Funding sources had no role in study conception, design, data collection, data analysis, manuscript review, or decision to submit the manuscript for publication.

**Competing interests:** I have read the journal's policy and the authors of this manuscript have the following competing interests: ACT receives a stipend as a Specialty Consulting Editor for PLOS Medicine and serves on the journal's editorial board.

**Abbreviations:** AOR, adjusted odds ratio; ARR, adjusted risk ratio; CASIC, Computer Assisted Survey Information Collection; LMICs, low- and middle-income countries.

and two-thirds were married or cohabiting (64%). The mean age was 42 years. Across all types of mental illness and treatment scenarios, relative to the control vignette (22%–30%), substantially more study participants believed the woman in the vignette was receiving divine punishment (31%–54%) or believed she brought shame on her family (51%–73%), and most were unwilling to have her marry into their families (80%–88%). In multivariable Poisson regression models, vignette portrayals of untreated mental illness, relative to the control condition, increased the risk that study participants endorsed stigmatizing personal beliefs about mental illness and about persons with mental illness, irrespective of mental illness type (adjusted risk ratios [ARRs] varied from 1.7–3.1, all  $p < 0.001$ ). Portrayals of effectively treated mental illness or treatment followed by subsequent relapse also increased the risk of responses indicating stigmatizing personal beliefs relative to control (ARRs varied from 1.5–3.0, all  $p < 0.001$ ). The magnitudes of the estimates suggested that portrayals of initially effective treatment (whether followed by relapse or not) had little moderating influence on stigmatizing responses relative to vignettes portraying untreated mental illness. Responses to questions about perceived norms followed similar patterns. The primary limitations of this study are that the vignettes may have omitted context that could have influenced stigma and that generalizability beyond rural Uganda may be limited.

## Conclusions

In a population-based, randomized survey experiment conducted in rural southwestern Uganda, portrayals of effectively treated mental illness did not appear to reduce endorsement of stigmatizing beliefs about mental illness or about persons with mental illness. These findings run counter to evidence from the United States. Further research is necessary to understand the relationship between mental illness treatment and stigmatizing attitudes in Uganda and other countries worldwide.

## Trial registration

The experimental procedures for this study were registered with ClinicalTrials.gov as "Measuring Beliefs and Norms About Persons With Mental Illness" ([NCT03656770](https://clinicaltrials.gov/ct2/show/study/NCT03656770)).

### Author summary

#### Why was this study done?

- Mental illness stigma is a fundamental barrier to improving mental health worldwide.
- While there has been some progress in understanding how to reduce mental illness stigma in high-income countries, it is unclear how this understanding might generalize to low- and middle-income countries.
- The extent to which people perceive that mental illness can be effectively treated may be an important component of changing negative beliefs about mental illness.

### What did the researchers do and find?

- We conducted a survey experiment to understand how information about successful treatment of mental illness might affect stigmatizing beliefs in rural southwestern Uganda.
- This experiment involved randomly assigning different people in eight villages to read a vignette about: a woman who had signs suggestive of one of three different types of mental illness; a woman who had these signs and was treated successfully; or a woman who had these signs and was treated successfully but subsequently relapsed.
- We found that stigma toward mental illness in the community was common and was generally unaffected by descriptions of successful treatment.

### What do these findings mean?

- If unaddressed, stigma will continue to pose a major barrier to improving population mental health in Uganda.
- We need to do more research to understand the relationship between perceptions of mental illness treatment and stigmatizing attitudes in Uganda and other countries worldwide.
- Engaging local etiologies, making treatment more accessible, and understanding how mental illness shapes social relationships independent of actual symptoms might be important avenues of research and program implementation to explore.

## Introduction

Mental illness is heavily stigmatized worldwide. In cross-national studies, people with mental illness report experiencing discrimination in most areas of their life, including making friends, keeping jobs, or interacting with their partners and families [1–3]. Available evidence suggests that while beliefs about mental illness vary by country, negative attitudes toward people with mental illness are neither uncommon nor isolated [4,5]. Widespread negative attitudes provide an enabling environment for harmful violations of basic human rights that range in severity from prejudicial behavior and employment discrimination to chaining, caging, and killing [6,7]. These attitudes undercut efforts to improve mental health at a fundamental level because stigma undermines already low rates of mental-healthcare-seeking behavior [8–18]. Compounding this attenuating effect on treatment-seeking, stigma is also associated with reduced public support for funding toward mental health services, which erodes the availability of appropriate care within the mental healthcare system [19–21].

Attempts to reduce stigma in high-income countries have achieved some measure of success, though the durability of these results is uncertain [22,23]. Furthermore, the evidence, especially from low- and middle-income countries (LMICs), is not sufficient to understand the extent to which these interventions can be generalized [24–32]. Contrary to the hypotheses that motivated many of the early large-scale awareness campaigns in many high-income countries during the 1990s and 2000s, increasing understanding of the potential biological

underpinnings of mental illness has not positively influenced attitudes toward persons with mental illness, and there are some circumstances in which this increasing biological understanding may have even worsened stigma [26,33–38]. The successes of recent contact-based interventions that promote meaningful contact with persons with mental illness alongside targeted education appear to hold some promise for long-term stigma reduction efforts [22,23,39–42]. While results from this class of interventions are somewhat mixed, a key ingredient of successful contact interventions seems to be an emphasis on recovery [43,44]. It may be, then, that one reason early interventions failed to reduce stigma is that the stigma attached to mental illness is driven in large part by beliefs about the extent to which it can be treated [45], and, despite increasing acceptance of biological causes of mental illness, many people continue to perceive mental illness to be untreatable [10,46].

Experiments that have been conducted to examine the relationship of treatment information to stigmatizing attitudes in the United States have shown that providing study participants with vignettes describing successful treatment of mental illness can reduce desire for social distance and negative attitudes about mental illness and can enhance beliefs in the effectiveness of treatment [47–49]. This treatable-illness hypothesis has not been tested internationally, but related literature on HIV stigma in sub-Saharan Africa suggests that the widespread availability of effective HIV antiretroviral treatment has enabled people with HIV to actively contribute (socially and economically) to their communities, thereby reducing internalized stigma among people with HIV and enhancing their standing in the general community [50–56]. Taken together, these studies suggest that the connection between perceptions of treatability and mental illness stigma may also generalize to contexts like sub-Saharan Africa.

To investigate the treatable-illness hypothesis, we embedded a survey experiment into a whole-population cohort study in rural southwestern Uganda. Adapting vignettes from the General Social Survey and the novel study by McGinty and colleagues [48], we aimed to determine whether the extent to which mental illness was portrayed as a treatable medical condition affected personal beliefs and perceived norms about mental illness and about people with mental illness. Specifically, we hypothesized that descriptions of mental illness alone and relapse after initially effective treatment would elicit more stigmatizing responses compared with descriptions of successfully treated mental illness.

## Methods

### Study population

This study was conducted in the eight villages of Nyakabare Parish, a rural administrative sub-unit of Mbarara District in the southwest region of Uganda. The study site is representative of rural communities in Mbarara District; it is relatively isolated, with an economy dominated by small-scale farming, animal husbandry, and petty trading, and both food and water insecurity are common [57,58]. All procedures were embedded within an ongoing, whole-population social network cohort study in which study participants are surveyed biennially [59]. The study includes all adults aged 18 years and above (and emancipated minors aged 16–17 years) who maintain stable primary residence within the roughly 11-square-kilometer area of the parish and who can give informed consent to participate. Exclusions include people who cannot communicate meaningfully with research staff, for example, because of deafness, mutism, or aphasia; people with behavioral problems thought to represent psychosis, neurological damage, or acute intoxication; and people too cognitively impaired to provide informed consent. Participants in the baseline survey, which was completed in 2015, served as the randomization sample for the present survey experiment. The second biennial survey was fielded between November 2016 and June 2018, providing the data reported in this manuscript.

## Experimental design and data collection

A total of 1,776 participants (who were enumerated in the 2014–2015 baseline survey) were randomly assigned to receive one of 10 different vignettes describing a young woman (see [S1 Text](#)). Reporting was guided by the CONSORT checklist (see [S1 CONSORT checklist](#)). The control vignette described the demographic characteristics and basic life story of a typical Ugandan woman with no further elaboration. The remaining nine vignettes included the same basic description of the woman but also described her experiencing three different types of symptoms (psychosis, mania, and depression, suggestive of schizophrenia, bipolar disorder, and major depressive disorder, respectively), each with three different treatment outcomes (no treatment, successful treatment followed by recovery, and successful treatment followed by recovery and then relapse/recurrence). These vignettes were adapted from McGinty and colleagues [48] to fit the local context based on feedback from key informants, documented symptom presentation in Uganda, and consultation with psychiatrists at the Mbarara Regional Referral Hospital.

Each eligible person was approached in the field, typically at their home or place of employment, by a research assistant who spoke the local language (Runyankore) and who requested their participation in the study. The survey was framed in general terms as a study about the social lives and health of residents of Nyakabare Parish, not as a study about beliefs about mental illness. For persons who expressed potential interest, the study was described in detail, and their written informed consent to participate was obtained. Study participants who could not sign their name were permitted to indicate consent with a thumbprint. All research assistants received in-depth training on how to administer surveys for gathering sensitive information, including instructions on how to temporarily halt the survey if another person came within earshot.

After study participants were presented with one of the 10 vignettes, they were asked to respond to three questions regarding their personal beliefs about mental illness and about people with mental illness, and three questions regarding their perceptions of village norms about mental illness and about people with mental illness. (For the sake of parsimony in writing, hereafter we refer to the subject of these questions using the shorthand “about mental illness.”) Specifically, participants were asked whether they would allow the woman to marry a member of their family, whether they believed the woman was receiving divine punishment for engaging in immoral behavior, and whether they believed she brought shame upon her family. These questions measure three different domains of stigma that are salient to the local context: social distance [60–62], etiological attribution [34], and courtesy stigma [63–65]. In response to the three items about personal beliefs, participants were allowed to provide one of five different responses: “Yes,” “No,” “It depends on knowing more details,” “Do not know,” and “Refuse to respond.”

Paralleling these three outcome variables measuring personal beliefs, study participants were also asked about the proportion of other people in their village who would allow the woman to marry a member of their families, the proportion of other people in the village who believed the woman was receiving divine punishment for engaging in immoral behavior, and the proportion of other people in their village who believed she brought shame upon her family. These questions measure the same domains of stigma (social distance, etiological attribution, and courtesy stigma) but focus on perceived norms rather than personal beliefs. These questions were modeled after previously published studies of perceived norms about different health behaviors and health risk behaviors [66–69]. The survey questions specified “your village” so that all participants would have a similar fixed, unambiguous reference group when describing their perceptions about the norm within their villages [70]. Response options for

the items about perceived norms followed a four-point Likert-type scale (in addition to “Do not know” and “Refuse to respond”): “All or almost all,” “More than half,” “Fewer than half,” and “Very few, or no one.”

The English translations of the six outcome measures are provided in [S1 Text](#). The vignettes and associated survey questions were first written in English, translated into Runyankore, and then back-translated into English to verify the fidelity of the translated text. The translation and back-translation followed an iterative process involving in-depth consultation and pilot testing with key informants.

Participants were allocated to the 10 vignettes in equal proportions in a parallel group design in which treatment assignment was determined centrally using a computerized random number generator. Neither the research assistants administering the questionnaires nor the study participants were aware of the vignettes to which the study participants had been assigned. The research assistants were not blinded, however, so they likely perceived the differences in the vignettes being administered to different study participants. To ensure balance across sex and village strata, we generated 16 separate randomization schedules for subsets of participants defined by strata of sex and village of residence [71]. The vignettes and all associated survey questions were programmed into laptop computers running the Computer Assisted Survey Information Collection (CASIC) Builder software program (West Portal Software Corporation, San Francisco, CA, USA) so that the surveys could be administered in the field. The experimental procedures for this study were registered with ClinicalTrials.gov (NCT03656770). The protocol record was entered in April 2017 but, because of an administrative error, was not released on ClinicalTrials.gov until August 2018.

## Analysis

The analysis was prespecified prior to data collection ([S2 Text](#)). For the three outcome variables measuring personal beliefs, responses were coded such that 0 denoted a nonstigmatizing response and 1 denoted a stigmatizing or ambivalent response. Namely, unwillingness to allow the woman to marry a member of the participant’s family, belief that she was receiving divine punishment, and belief that she brought shame on her family were assigned values of 1, along with the ambivalent response of “it depends.” Willingness to allow the woman to marry into the family, belief that she was not receiving divine punishment, and belief that she did not bring shame upon her family were assigned values of 0. “Do not know” and “refuse” were considered missing data. We then fitted Poisson regression models specifying each outcome as the dependent variable and the vignette treatment assignment as the primary exposure of interest. Cluster-correlated robust estimates of variance were used so that the estimated incidence rate ratios could be interpreted as risk ratios [72,73].

For the three 4-level categorical outcome variables measuring perceived norms, responses were coded 1–4 such that the lowest category denoted the least perceived stigma and the highest category denoted the most perceived stigma. (For example, in response to the question about whether others in the village would permit the woman in the vignette to marry into the family, “Very few, or no one” was the highest category and “All or almost all” was the lowest category.) “Do not know” and “refuse” were considered missing data. We then fitted ordinal logit regression models specifying each outcome as the dependent variable and the vignette treatment assignment as the primary exposure of interest. The exponentiated regression coefficients were interpreted as estimated odds ratios. To confirm that the regression coefficients did not vary across the logit equations (i.e., the assumption of proportional odds), we used the omnibus Wald test by Brant [74].

To ensure accurate confidence intervals that accounted for the stratified randomization scheme, we adjusted treatment estimates for sex and village of residence by including them as covariates in the respective Poisson and ordinal logit regression models described above. Stata statistical software was used to conduct all data cleaning and analysis (version 14.0, College Station, TX, USA).

### Ethics statement

Ethical approval for this study was granted by the Partners Human Research Committee at Massachusetts General Hospital and the Research Ethics Committee at Mbarara University of Science and Technology. We also received clearance for the study from the Uganda National Council of Science and Technology and the Research Secretariat in the Office of the President of the Republic of Uganda.

### Results

Of the 1,776 participants enumerated and randomized in the 2014–2015 survey, 1,355 (76%) were successfully interviewed in 2016–2018, excluding 10 individuals who were not administered the experiment correctly because of a technical error. Of the remainder, 250 (14%) were known to have emigrated out of the study site, 57 (3%) could not be located, 37 (2%) had died, 42 (2%) refused to participate, and 25 (1%) were ineligible or could not be interviewed for other reasons (for example, incarceration or acute intoxication at each of multiple interview attempts). We summarize participant characteristics in [Table 1](#). Respondents came from all eight villages, and just over half were women (56%). The mean age was 42 years, with good representation from all age groups. Just over half (57%) had completed primary school, and almost two-thirds were married or cohabiting (64%).

A technical error in survey administration resulted in some treatment assignments that departed from the intended randomization. ([S3 Text](#) provides further detail about the nature of the error, a comparison of the correctly versus incorrectly assigned participants, and results of a sensitivity analysis based on a data set excluding the incorrectly assigned participants. As shown in the [S3 Text](#), neither the reported results nor final conclusions were substantively affected by the error.) Participants who received a vignette portraying any kind of mental illness reported more stigmatizing personal beliefs compared with those who received the control vignette, across all outcomes, for every variant of symptom presentation, and for every variant of treatment description ([Table 2](#)). Across outcomes, relative to the control vignette (22%–30%), substantially more study participants believed the woman in the vignette was receiving divine punishment (31%–54%) or believed she brought shame on her family (51%–73%), and most were unwilling to have her marry into their family (80%–88%). A small number of study participants provided ambivalent responses (1%–8%, depending on the outcome), and there were negligible refusals (<1%) and "don't know" (0%–4%) responses.

Compared with the responses to questions about their personal beliefs, study participants' responses to questions about perceived norms about people with mental illness followed similar patterns, though the differences in comparison with the control vignette were not as large in magnitude ([Table 3](#)). Once again, there were negligible refusals (<1%) and "don't know" (0%–6%) responses.

Using Poisson regression models that also adjusted for the stratification variables, we found that portrayals of mental illness significantly increased the risk of stigmatizing responses compared to the control vignettes, across all outcomes, for every variant of symptom presentation, and for every variant of treatment description—except one ([Table 4](#)). Namely, participants who received the vignette describing a woman receiving effective treatment for depressive

**Table 1. Participant characteristics.**

|                                                | N   | %   |
|------------------------------------------------|-----|-----|
| <b>Sex</b>                                     |     |     |
| Male                                           | 599 | 44% |
| Female                                         | 756 | 56% |
| <b>Education</b>                               |     |     |
| None                                           | 197 | 15% |
| Some primary (P1–P6)                           | 393 | 29% |
| Completed primary (P7)                         | 332 | 25% |
| Beyond primary (S1–S6, vocational, university) | 433 | 32% |
| <b>Marital status</b>                          |     |     |
| Single                                         | 484 | 36% |
| Married/cohabiting                             | 871 | 64% |
| <b>Age category</b>                            |     |     |
| 18–25 years                                    | 209 | 15% |
| 26–35 years                                    | 337 | 25% |
| 36–45 years                                    | 274 | 20% |
| 46–55 years                                    | 248 | 18% |
| 56+ years                                      | 263 | 19% |
| Unknown                                        | 24  | 2%  |
| <b>Village</b>                                 |     |     |
| 1                                              | 210 | 15% |
| 2                                              | 192 | 14% |
| 3                                              | 177 | 13% |
| 4                                              | 156 | 12% |
| 5                                              | 110 | 8%  |
| 6                                              | 202 | 15% |
| 7                                              | 112 | 8%  |
| 8                                              | 196 | 14% |

<https://doi.org/10.1371/journal.pmed.1002908.t001>

symptoms but then experiencing a subsequent relapse were no more likely to believe she was receiving divine punishment than participants in the control group (adjusted relative risk [ARR] = 1.46, 95% CI 0.89–2.51,  $p = 0.18$ ). Apart from that exception, participants who received vignettes depicting a woman with a mental illness were, depending on the symptom presentation and treatment experience described, 2.64–2.98 times more likely (than those who received the control vignette) to be unwilling to allow a family member to marry her, 2.20–3.14 times more likely to believe that she brought shame upon her family, and 1.53–2.49 times more likely to believe that she was receiving divine punishment (all  $p$ -values < 0.05).

Contrary to our hypotheses motivated by the work of McGinty and colleagues [48], study participants who received vignettes depicting effective treatment were only slightly less likely to endorse stigmatizing responses compared with those who received vignettes depicting untreated mental illness. In the case of bipolar illness, participants receiving the vignette about effective treatment were still more likely to endorse stigmatizing responses than participants receiving the control vignette (ARRs ranged from 1.8–2.6, all  $p < 0.001$ ), but the ARR were smaller in magnitude compared with those receiving the vignette about untreated bipolar illness (ARRs ranged from 2.5–3.1, all  $p < 0.001$ ) ( $p$ -value for comparisons all < 0.05).



**Table 2. Stigmatizing personal beliefs by treatment assignment.**

| Stigmatizing Personal Beliefs |                | Unwilling for family member to marry <sup>a</sup> | Is receiving divine punishment <sup>a</sup> | Brings shame on family <sup>a</sup> |
|-------------------------------|----------------|---------------------------------------------------|---------------------------------------------|-------------------------------------|
| Control                       |                | 37 (30%)                                          | 27 (22%)                                    | 29 (23%)                            |
| Schizophrenia                 | Mental illness | 120 (86%)                                         | 58 (41%)                                    | 90 (64%)                            |
|                               | + Treatment    | 120 (86%)                                         | 56 (40%)                                    | 72 (51%)                            |
|                               | + Relapse      | 249 (83%)                                         | 108 (36%)                                   | 170 (56%)                           |
| Bipolar                       | Mental illness | 116 (87%)                                         | 72 (54%)                                    | 98 (73%)                            |
|                               | + Treatment    | 98 (78%)                                          | 50 (40%)                                    | 68 (54%)                            |
|                               | + Relapse      | 71 (80%)                                          | 29 (33%)                                    | 49 (55%)                            |
| Depression                    | Mental illness | 82 (80%)                                          | 36 (35%)                                    | 62 (61%)                            |
|                               | + Treatment    | 80 (78%)                                          | 40 (39%)                                    | 55 (54%)                            |
|                               | + Relapse      | 86 (88%)                                          | 30 (31%)                                    | 50 (51%)                            |

<sup>a</sup>N (%) refer to the number and proportion of study participants assigned to each treatment arm who endorsed the stigmatizing belief shown in the column header. Column percentages do not add to 100% because each column represents a different outcome variable (i.e., the columns do not represent categories of a single categorical variable).

<https://doi.org/10.1371/journal.pmed.1002908.t002>

Results from the ordered logit regression models comparing perceived norms followed a similar pattern to that of personal beliefs (Table 5). Across all outcomes, for every variant of symptom presentation, and for every variant of treatment description, a vignette describing any type of mental illness (untreated, treated, or treated with relapse) increased the odds that participants perceived more people in their village would be unwilling to allow the woman to marry into their families, participants perceived more people would believe that she brings shame upon her family, and participants perceived more people would believe that she was receiving divine punishment. As with the data on personal beliefs, in the case of bipolar illness, participants receiving the vignette about effective treatment were still more likely to endorse

**Table 3. Perceived stigmatizing beliefs of others by treatment assignment.**

| Perception that Most Others (>50% of Others) Hold Stigmatizing Belief <sup>a</sup> |                | Most others unwilling for family member to marry <sup>b</sup> | Most others believe receiving divine punishment <sup>b</sup> | Most others believe Brings shame on family <sup>b</sup> |
|------------------------------------------------------------------------------------|----------------|---------------------------------------------------------------|--------------------------------------------------------------|---------------------------------------------------------|
| Control                                                                            |                | 38 (30%)                                                      | 25 (20%)                                                     | 23 (18%)                                                |
| Schizophrenia                                                                      | Mental illness | 114 (81%)                                                     | 39 (28%)                                                     | 59 (42%)                                                |
|                                                                                    | + Treatment    | 113 (81%)                                                     | 47 (34%)                                                     | 62 (44%)                                                |
|                                                                                    | + Relapse      | 257 (86%)                                                     | 79 (26%)                                                     | 126 (42%)                                               |
| Bipolar                                                                            | Mental illness | 117 (87%)                                                     | 50 (37%)                                                     | 67 (50%)                                                |
|                                                                                    | + Treatment    | 104 (83%)                                                     | 31 (25%)                                                     | 51 (41%)                                                |
|                                                                                    | + Relapse      | 75 (84%)                                                      | 21 (24%)                                                     | 37 (42%)                                                |
| Depression                                                                         | Mental illness | 76 (75%)                                                      | 32 (31%)                                                     | 41 (40%)                                                |
|                                                                                    | + Treatment    | 86 (84%)                                                      | 33 (32%)                                                     | 36 (35%)                                                |
|                                                                                    | + Relapse      | 83 (85%)                                                      | 21 (21%)                                                     | 42 (43%)                                                |

<sup>a</sup>The numbers and percentages in each cell refer to the percentage of study participants who believe that most others (>50% of others) in their village hold the stigmatizing belief in question.

<sup>b</sup>N (%) refer to the number and proportion of study participants assigned to each treatment arm who endorsed the stigmatizing belief shown in the column header. Column percentages do not add to 100% because each column represents a different outcome variable (i.e., the columns do not represent categories of a single categorical variable).

<https://doi.org/10.1371/journal.pmed.1002908.t003>

**Table 4. Risk of stigmatizing personal beliefs by treatment assignment based on Poisson regression.**

| Stigmatizing Personal Beliefs |                | Unwilling for family member to marry |         | Is receiving divine punishment |         | Brings shame on family |         |
|-------------------------------|----------------|--------------------------------------|---------|--------------------------------|---------|------------------------|---------|
|                               |                | ARR (95% CI)                         | p-value | ARR (95% CI)                   | p-value | ARR (95% CI)           | p-value |
| <b>Control</b>                |                | Reference                            |         | Reference                      |         | Reference              |         |
| Schizophrenia                 | Mental illness | 2.9 (2.0–4.2)                        | <0.001  | 2.0 (1.3–2.9)                  | 0.001   | 2.8 (2.0–3.8)          | <0.001  |
|                               | + Treatment    | 2.9 (1.9–4.4)                        | <0.001  | 1.9 (1.0–3.3)                  | 0.035   | 2.2 (1.4–3.6)          | 0.001   |
|                               | + Relapse      | 2.8 (1.9–4.2)                        | <0.001  | 1.7 (1.1–2.7)                  | 0.020   | 2.5 (1.8–3.5)          | <0.001  |
| Bipolar                       | Mental illness | 3.0 (1.9–4.5)                        | <0.001  | 2.5 (1.9–3.3)                  | <0.001  | 3.1 (2.2–4.4)          | <0.001  |
|                               | + Treatment    | 2.6 (1.9–3.6)                        | <0.001  | 1.8 (1.3–2.6)                  | <0.001  | 2.4 (1.7–3.3)          | <0.001  |
|                               | + Relapse      | 2.7 (1.8–4.1)                        | <0.001  | 1.5 (1.0–2.3)                  | 0.03    | 2.4 (1.8–3.2)          | <0.001  |
| Depression                    | Mental illness | 2.7 (1.8–4.1)                        | <0.001  | 1.7 (1.2–2.3)                  | 0.002   | 2.6 (1.8–3.7)          | <0.001  |
|                               | + Treatment    | 2.7 (1.8–4.1)                        | <0.001  | 1.8 (1.1–3.1)                  | 0.027   | 2.3 (1.6–3.5)          | <0.001  |
|                               | + Relapse      | 3.0 (2.0–4.5)                        | <0.001  | 1.5 (0.8–2.5)                  | 0.177   | 2.2 (1.5–3.2)          | <0.001  |

**Abbreviations:** ARR, adjusted risk ratio.

<https://doi.org/10.1371/journal.pmed.1002908.t004>

stigmatizing responses than participants receiving the control vignette (adjusted odds ratios [AORs] ranged from 1.8–10.5, all  $p < 0.001$ ) but the AORs were smaller in magnitude compared with those receiving the vignette about untreated bipolar illness (AORs ranged from 3.1–16.3, all  $p < 0.001$ ) ( $p$ -value for comparisons all  $< 0.01$ ).

## Discussion

In this population-based, randomized survey experiment conducted in rural southwestern Uganda, portrayals of effectively treated mental illness did not appear to reduce endorsement of stigmatizing responses about mental illness. Instead, any kind of mental illness portrayal—whether untreated, successfully treated, or treated with relapse—resulted in an overwhelmingly large proportion of stigmatizing responses. Among those responses, refusal to have a

**Table 5. Odds of perceiving stigmatizing beliefs of others by treatment assignment based on ordered logit regression.**

| Perceived Norms |                | Most others unwilling for family member to marry |         | Most others believe receiving divine punishment |         | Most others believe brings shame on family |         |
|-----------------|----------------|--------------------------------------------------|---------|-------------------------------------------------|---------|--------------------------------------------|---------|
|                 |                | AOR (95% CI)                                     | p-value | AOR (95% CI)                                    | p-value | AOR (95% CI)                               | p-value |
| <b>Control</b>  |                | Reference                                        |         | Reference                                       |         | Reference                                  |         |
| Schizophrenia   | Mental illness | 14.0 (6.3–31.4)                                  | <0.001  | 2.1 (1.5–2.9)                                   | <0.001  | 3.8 (2.0–7.1)                              | <0.001  |
|                 | + Treatment    | 9.2 (3.5–24.3)                                   | <0.001  | 2.7 (1.6–4.6)                                   | <0.001  | 3.9 (1.9–7.9)                              | <0.001  |
|                 | + Relapse      | 15.7 (7.8–31.7)                                  | <0.001  | 2.0 (1.4–2.7)                                   | <0.001  | 3.6 (2.5–5.1)                              | <0.001  |
| Bipolar         | Mental illness | 16.3 (7.0–37.8)                                  | <0.001  | 3.1 (2.1–4.6)                                   | <0.001  | 5.1 (4.0–6.4)                              | <0.001  |
|                 | + Treatment    | 10.5 (4.7–23.7)                                  | <0.001  | 1.8 (1.4–2.5)                                   | <0.001  | 3.3 (2.5–4.5)                              | <0.001  |
|                 | + Relapse      | 9.1 (4.1–20.2)                                   | <0.001  | 2.0 (1.2–3.3)                                   | 0.008   | 3.1 (1.8–5.2)                              | <0.001  |
| Depression      | Mental illness | 6.9 (2.5–19.0)                                   | <0.001  | 2.8 (1.8–4.3)                                   | <0.001  | 3.3 (1.9–5.9)                              | <0.001  |
|                 | + Treatment    | 11.0 (4.5–26.9)                                  | <0.001  | 2.6 (1.8–3.8)                                   | <0.001  | 3.1 (1.6–6.0)                              | 0.001   |
|                 | + Relapse      | 11.7 (5.4–25.3)                                  | <0.001  | 1.7 (1.1–2.5)                                   | 0.012   | 3.6 (2.3–5.4)                              | <0.001  |

The estimated AORs in each cell refer to the relative odds of being in a higher category of perceiving that more people in their village (ranging from “very few, or no one” to “all or almost all”) hold the stigmatizing belief in question. **Abbreviations:** AOR, adjusted odds ratio.

<https://doi.org/10.1371/journal.pmed.1002908.t005>

woman with mental illness marry into the family was the most common, though beliefs that her mental illness created shame for the family or was the result of divine punishment were also fairly common. Perceptions of village norms followed similar patterns as individual beliefs.

Our primary finding that varying degrees of treatment success had no ameliorating effect on stigmatizing beliefs runs contrary to other similar studies conducted in the United States, which have found that portrayals of effective treatment reduced stigma for a variety of mental illnesses [47–49]. Below, we offer several possible reasons why treatment information may have produced differing levels of stigmatizing responses in this study as compared with previously published work.

Lebowitz and Ahn's [47] experiment examining the role of etiology in stigma and treatment descriptions may provide one explanation for this discrepancy. By varying the description of mental illness etiology as well its treatment, they showed that attributing a mental illness to biological origins largely parallels the findings of other studies, with worsened stigma resulting when the vignette did not mention treatment but reduced stigma resulting when the vignette described effective treatment. By contrast, ascribing a nonbiological cause to the mental illness rendered the treatment information irrelevant. In our study, we may have observed this latter effect. Nonbiological interpretations of mental illness are widely held in Uganda [75–79] and sub-Saharan Africa generally (particularly in rural areas) [80–85], unlike many high-income countries, which have experienced steady shifts over the past several decades in the direction of a neurobiological understanding of mental illness [34,86]. One potential interpretation of our findings is that participants may have viewed the symptoms as essentially nonbiological and therefore received the information about biomedical treatment as being less salient (compared with participants in studies previously conducted in the United States). What we described as “effective treatment” may not have addressed what many of our participants understood to be the true ailment and source of stigma [87].

Apart from etiology, confidence in the treatment process itself may also explain the discrepant findings. Uganda's mental health system, much like those in other low-income countries, lacks the resources necessary to consistently provide effective treatment across the country, with only 2.96 mental health workers (including just 0.09 psychiatrists and 2.24 mental health nurses) per 100,000 people [88]. With pharmaceutical treatment availability concentrated in urban areas and typically limited to older, cheaper, and less effective medications, participants in this study may have perceived mental health treatment to be largely ineffective or inaccessible [76,77,89]. These perceptions may have attenuated the effect that providing them with treatment information could have had on stigmatizing beliefs elicited in the survey [90].

Even with descriptions of etiologically appropriate or available treatment, participants may still have understood mental illness to be essentially permanent. Key informants pointed to a local Runyankore proverb, “one who has been mad will always scare the children,” that captures the widely held perception that mental illness is simply not treatable. This belief that mental illness is never truly eliminated even if treated to long-term remission likely interacts in significant ways with etiological attributions and experiences with the mental healthcare system. However, as Schnittker and colleagues [46] note in their reflection on the failures of genetic descriptions to reduce stigma in the US, etiological beliefs and even endorsement of treatment are distinct from the idea that a person can truly recover from mental illness. This belief that mental illness is a permanent condition independent of its symptoms is most characteristic of classic stigma in that it is a “mark” or label that relates people with mental illness to undesirable attributes intrinsically as a permanent identity [65,91,92]. The loss of status associated with this label, as the results of our study show, might never be reversed even if someone resumes all roles and social functions symptom-free. Many of the studies on mental

illness and its associated stigma in Uganda, and in sub-Saharan Africa generally, have focused on causation and explanatory models [75–85]. There has been far less attention to the ways mental illness can shape enduring social identities and relationships that may be only indirectly related to actual symptoms and treatment [93,94].

A second important finding of our study is that we observed highly stigmatizing responses regardless of symptom presentation and across multiple domains. Key informant feedback suggests that participants in our study did not differentiate between the different symptom presentations and instead likely understood all variations in symptom presentation to represent a single category of mental illness. Whether or not these anecdotal observations held true throughout the study sample, our data show that stigma toward people exhibiting symptoms of mental illness was very common, consistent with the pattern of findings documented in other studies [1–3]. That most participants in our study believe mental illness brings shame on a person's family also highlights the effects stigma can have on isolating people and undermining their ability to obtain social support [64,95–97].

Interpretation of our findings is subject to several important limitations. Our use of vignettes as the primary experimental manipulation allowed us to vary key details of each description. Nonetheless, study participants were only exposed to hypothetical scenarios that were potentially lacking in context that might influence stigma [62,98]. This limitation is especially important in light of evidence that the stigma of mental illness can interact and be compounded by other intersecting identities [99]. For example, several studies have shown that gender can interact with mental illness type to affect stigma [100,101], and recent evidence from related literature suggests that socioeconomic status may also influence participant responses [102]. Since our vignettes only described a woman with average socioeconomic status for the region, we are unable to determine whether and how descriptions of other identities could have yielded differences in stigmatizing responses. For example, if the vignettes had portrayed a similar man with mental illness, it is possible that the findings would have been different. Second, it is possible that social desirability bias could have affected study participants' responses [103]. If negative attitudes toward persons with mental illness were understood to be socially undesirable, study participants might have overestimated the proportion of others who would endorse stigmatizing attitudes while underreporting their own stigmatizing attitudes toward persons with mental illness [62,103,104]. This phenomenon was not observed in the data. Participants generally overestimated the proportion of others who would be unwilling to have the woman marry into their families but generally underestimated the extent to which others believed the woman was receiving divine punishment or brought shame on her family. It is important to note that, while social desirability bias could have affected the overall levels of stigma in the population, it is an unlikely explanation for the differences in levels of stigma across the treatment arms (given the randomized design). A third limitation is that this experiment focused on mental illnesses but did not include descriptions of substance use disorders, for which perceptions and attitudes are likely to differ significantly [48,105–107]. Fourth, our findings may not generalize beyond this rural region of southwestern Uganda. Other studies have found important differences in mental illness stigma between rural and urban areas [108,109]. However, the study was based on a whole-population sample, and the community we surveyed shares important characteristics with the rest of the country and the East African region. Finally, it is important to note that a brief vignette portrayal of mental illness as a treatable health condition might not have an enduring educational effect (that could therefore translate into an enduring antistigma effect). It is possible that more sustained education about the treatability of mental illness could have affected study participants' responses differently. That being said, it is notable that in Uganda, more education does not appear to have reduced

the stigma attached to HIV [110] and that the evidence for efficacy of education-based interventions in reducing mental illness stigma is also mixed [111].

The results from this study have several important applications for treatment and policy in Uganda. Primarily, it is clear that mental illness remains highly stigmatized in Uganda. Given the well-established connections between stigma and undertreatment, underfunding, and even abuse of people with mental illnesses, there remains important work to be done in reducing stigma to improve the health and lives of persons with mental illness. Second, this experiment indicates that portrayals of successful treatment of mental illness did not reduce stigmatizing attitudes in Uganda the way it seemed to reduce stigmatizing attitudes in the US. Further research, particularly qualitative investigation into the stigma attached to mental illness, is needed to achieve deeper understanding of the stigma pathways associated with mental illness throughout East Africa.

In summary, we found that mental illness stigma is common in rural southwestern Uganda. Stigma erodes efforts to promote mental health, preventing people from seeking treatment and putting them at risk for further suffering [91]. Describing mental illness as treatable does not seem to have had any effect on reducing negative attitudes toward mental illness or persons with mental illness in rural southwestern Uganda. Instead, further research into stigma reduction is necessary to understand other ways to address the stigma of mental illness in East Africa.

## Supporting information

### **S1 Text. Vignettes presented to participants.**

(DOCX)

### **S2 Text. Prespecified analysis plan for measuring beliefs and norms about persons with mental illness.**

(DOCX)

### **S3 Text. Description of technical error.**

(DOCX)

### **S1 CONSORT Checklist. Checklist of information to include when reporting a randomized trial.**

(DOCX)

## Acknowledgments

We thank the HopeNet cohort study participants, without whom this research would not be possible. We also thank members of the HopeNet study team for research assistance. In addition to the named study authors, HopeNet Study team members who contributed to data collection and/or study administration during all or any part of the study were as follows: Phiona Ahereza, Owen Alleluya, Patience Ayebare, Dickson Beinomugisha, Bridget Burns, Patrick Gumisiriza, Mercy Juliet, Clare Kamagara, Justus Kananura, Allen Kiconco, Viola Kyokunda, Patrick Lukwago Muleke, Rhina Mushagara, Elijah Musinguzi, Elizabeth Betty Namara, Immaculate Ninsiima, Moran Owembabazi, Mellon Tayebwa, Ezra Turinanwe, Julius Turyasingura, and Dasha Vořechovská. We also thank Roger Hofmann of West Portal Software Corporation (San Francisco, CA, USA), for developing and customizing the CASIC Builder software program used for survey administration. No endorsement of manuscript contents or conclusions should be inferred from these acknowledgments.

The content is solely the responsibility of the authors and does not necessarily represent the official view of the US National Institutes of Health, Harvard University, or its affiliated academic healthcare centers. Funding sources had no role in study conception, design, data collection, data analysis, manuscript review, or decision to submit the manuscript for publication.

## Author Contributions

**Conceptualization:** Bernard Kakuhikire, Alexander C. Tsai.

**Data curation:** Justin D. Rasmussen.

**Formal analysis:** Justin D. Rasmussen.

**Funding acquisition:** Bernard Kakuhikire, Alexander C. Tsai.

**Investigation:** Justin D. Rasmussen, Bernard Kakuhikire, Charles Baguma, Scholastic Ashaba, Christine E. Cooper-Vince, Jessica M. Perkins, David R. Bangsberg, Alexander C. Tsai.

**Project administration:** Justin D. Rasmussen, Bernard Kakuhikire, Charles Baguma, Alexander C. Tsai.

**Supervision:** Alexander C. Tsai.

**Writing – original draft:** Justin D. Rasmussen.

**Writing – review & editing:** Justin D. Rasmussen, Bernard Kakuhikire, Charles Baguma, Scholastic Ashaba, Christine E. Cooper-Vince, Jessica M. Perkins, David R. Bangsberg, Alexander C. Tsai.

## References

1. Lasalvia A, Van Bortel T, Bonetto C, Jayaram G, van Weeghel J, Zoppei S, et al. Cross-national variations in reported discrimination among people treated for major depression worldwide: The ASPEN/INDIGO international study. *Br J Psychiatry*. 2015; 207: 507–514. <https://doi.org/10.1192/bjp.bp.114.156992> PMID: 26382952
2. Lasalvia A, Zoppei S, Van Bortel T, Bonetto C, Cristofalo D, Wahlbeck K, et al. Global pattern of experienced and anticipated discrimination reported by people with major depressive disorder: A cross-sectional survey. *Lancet*. 2013; 381: 55–62. [https://doi.org/10.1016/S0140-6736\(12\)61379-8](https://doi.org/10.1016/S0140-6736(12)61379-8) PMID: 23083627
3. Thornicroft G, Brohan E, Rose D, Sartorius N, Leese M. Global pattern of experienced and anticipated discrimination against people with schizophrenia: a cross-sectional survey. *Lancet*. 2009; 373: 408–415. [https://doi.org/10.1016/S0140-6736\(08\)61817-6](https://doi.org/10.1016/S0140-6736(08)61817-6) PMID: 19162314
4. Pescosolido BA, Medina TR, Martin JK, Long JS. The “backbone” of stigma: Identifying the global core of public prejudice associated with mental illness. *Am J Public Health*. 2013; 103: 853–860. <https://doi.org/10.2105/AJPH.2012.301147> PMID: 23488508
5. Seeman N, Tang S, Brown AD, Ing A. World survey of mental illness stigma. *J Affect Disord*. 2016; 190: 115–121. <https://doi.org/10.1016/j.jad.2015.10.011> PMID: 26496017
6. Drew N, Funk M, Tang S, Lamichhane J, Chávez E, Katontoka S, et al. Human rights violations of people with mental and psychosocial disabilities: an unresolved global crisis. *Lancet*. 2011; 378: 1664–1675. [https://doi.org/10.1016/S0140-6736\(11\)61458-X](https://doi.org/10.1016/S0140-6736(11)61458-X) PMID: 22008426
7. Kleinman A. Global mental health: A failure of humanity. *Lancet*. 2009; 374: 603–604. [https://doi.org/10.1016/S0140-6736\(09\)61510-5](https://doi.org/10.1016/S0140-6736(09)61510-5) PMID: 19708102
8. Corrigan PW. The impact of stigma on severe mental illness. *Cogn Behav Pract*. 1998; 5: 201–222. [https://doi.org/10.1016/S1077-7229\(98\)80006-0](https://doi.org/10.1016/S1077-7229(98)80006-0)
9. Corrigan PW. How stigma interferes with mental health care. *Am Psychol*. 2004; 59: 614–625. <https://doi.org/10.1037/0003-066X.59.7.614> PMID: 15491256
10. Schnyder N, Panczak R, Groth N, Schultze-Lutter F. Association between mental health-related stigma and active help-seeking: Systematic review and meta-analysis. *Br J Psychiatry*. 2017; 210: 261–268. <https://doi.org/10.1192/bjp.bp.116.189464> PMID: 28153928

11. Schomerus G, Angermeyer MC. Stigma and its impact on help-seeking for mental disorders: what do we know? *Epidemiol Psychiatr Sci.* 2008; 17: 31–37. <https://doi.org/10.1017/S1121189X00002669>
12. Thornicroft G. Stigma and discrimination limit access to mental health care. *Epidemiol Psychiatr Soc.* 2008; 17: 14–19. <https://doi.org/10.1017/S1121189X00002621> PMID: 18444452
13. Thornicroft G, Chatterji S, Evans-Lacko S, Gruber M, Sampson N, Aguilar-Gaxiola S, et al. Undertreatment of people with major depressive disorder in 21 countries. *Br J Psychiatry.* 2017; 210: 119–124. <https://doi.org/10.1192/bjp.bp.116.188078> PMID: 27908899
14. Clement S, Schauman O, Graham T, Maggioni F, Evans-Lacko S, Bezborodovs N, et al. What is the impact of mental health-related stigma on help-seeking? A systematic review of quantitative and qualitative studies. *Psychol Med.* 2015; 45: 11–27. <https://doi.org/10.1017/S0033291714000129> PMID: 24569086
15. Evans-Lacko S, Brohan E, Mojtabai R, Thornicroft G. Association between public views of mental illness and self-stigma among individuals with mental illness in 14 European countries. *Psychol Med.* 2012; 42: 1741–1752. <https://doi.org/10.1017/S0033291711002558> PMID: 22085422
16. Schomerus G, Stolzenburg S, Freitag S, Speerforck S, Janowitz D, Evans-Lacko S, et al. Stigma as a barrier to recognizing personal mental illness and seeking help: a prospective study among untreated persons with mental illness. *Eur Arch Psychiatry Clin Neurosci.* 2019; 269(4): 469–479. Epub 2018 Apr 20. <https://doi.org/10.1007/s00406-018-0896-0> PMID: 29679153
17. Schomerus G, Matschinger H, Angermeyer MC. The stigma of psychiatric treatment and help-seeking intentions for depression. *Eur Arch Psychiatry Clin Neurosci.* 2009; 259: 298–306. <https://doi.org/10.1007/s00406-009-0870-y> PMID: 19224105
18. Fox AB, Earnshaw VA, Taverna EC, Vogt D. Conceptualizing and measuring mental illness stigma: The mental illness stigma framework and critical review of measures. *Stigma Health.* 2018; 3(4): 348–376. Epub 2017 Sept 21. <https://doi.org/10.1037/sah0000104> PMID: 30505939
19. Barry CL, McGinty EE. Stigma and public support for parity and government spending on mental health: A 2013 national opinion survey. *Psychiatr Serv.* 2014; 65: 1265–1268. <https://doi.org/10.1176/appi.ps.201300550> PMID: 25270496
20. Kennedy-Hendricks A, Barry CL, Gollust SE, Ensminger ME, Chisolm MS, McGinty EE. Social stigma toward persons with prescription opioid use disorder: Associations with public support for punitive and public health-oriented policies. *Psychiatr Serv.* 2017; 68: 462–469. <https://doi.org/10.1176/appi.ps.201600056> PMID: 28045350
21. Stone EM, McGinty EE. Public willingness to pay to improve services for individuals with serious mental illness. *Psychiatr Serv.* 2018; 69: 938–941. <https://doi.org/10.1176/appi.ps.201800043> PMID: 29734922
22. Gronholm PC, Henderson C, Deb T, Thornicroft G. Interventions to reduce discrimination and stigma: the state of the art. *Soc Psychiatry Psychiatr Epidemiol.* 2017; 52: 249–258. <https://doi.org/10.1007/s00127-017-1341-9> PMID: 28144713
23. Henderson C, Robinson E, Evans-Lacko S, Corker E, Rebollo-Mesa I, Rose D, et al. Public knowledge, attitudes, social distance and reported contact regarding people with mental illness 2009–2015. *Acta Psychiatr Scand.* 2016; 134: 23–33. <https://doi.org/10.1111/acps.12607> PMID: 27426643
24. Morgan AJ, Reavley NJ, Ross A, Too LS, Jorm AF. Interventions to reduce stigma towards people with severe mental illness: Systematic review and meta-analysis. *J Psychiatr Res.* 2018; 103: 120–133. <https://doi.org/10.1016/j.jpsychires.2018.05.017> PMID: 29843003
25. Pescosolido BA. The public stigma of mental illness: What do we think; what do we know; what can we prove? *J Health Soc Behav.* 2013; 54: 1–21. <https://doi.org/10.1177/0022146512471197> PMID: 23325423
26. Thornicroft G, Mehta N, Clement S, Evans-Lacko S, Doherty M, Rose D, et al. Evidence for effective interventions to reduce mental-health-related stigma and discrimination. *Lancet.* 2016; 387: 1123–1132. [https://doi.org/10.1016/S0140-6736\(15\)00298-6](https://doi.org/10.1016/S0140-6736(15)00298-6) PMID: 26410341
27. Semrau M, Evans-Lacko S, Koschorke M, Ashenafi L, Thornicroft G. Stigma and discrimination related to mental illness in low- and middle-income countries. *Epidemiol Psychiatr Sci.* 2015; 24: 382–394. <https://doi.org/10.1017/S2045796015000359> PMID: 25937022
28. Mehta N, Clement S, Marcus E, Stona A-C, Bezborodovs N, Evans-Lacko S, et al. Evidence for effective interventions to reduce mental health-related stigma and discrimination in the medium and long term: Systematic review. *Br J Psychiatry.* 2015; 207: 377–384. <https://doi.org/10.1192/bjp.bp.114.151944> PMID: 26527664
29. Evans-Lacko S, Henderson C, Thornicroft G. Public knowledge, attitudes and behaviour regarding people with mental illness in England 2009–2012. *Br J Psychiatry.* 2013; 202: s51–s57. <https://doi.org/10.1192/bjp.bp.112.112979> PMID: 23553695

30. Heim E, Kohrt BA, Koschorke M, Milenova M, Thornicroft G. Reducing mental health-related stigma in primary health care settings in low- and middle-income countries: a systematic review. *Epidemiol Psychiatr Sci*. 2018; 1–10. Epub 2018 Sept 4. <https://doi.org/10.1017/S2045796018000458> PMID: 30176952
31. Kohrt BA, Jordans MJD, Turner EL, Sikkema KJ, Luitel NP, Rai S, et al. Reducing stigma among healthcare providers to improve mental health services (RESHAPE): protocol for a pilot cluster randomized controlled trial of a stigma reduction intervention for training primary healthcare workers in Nepal. *Pilot Feasibility Stud*. 2018; 4: 36. <https://doi.org/10.1186/s40814-018-0234-3> PMID: 29403650
32. Lasalvia A. Tackling the mental illness stigma in low- and middle-income countries: lessons learned from high-income countries and mistakes to avoid. *Epidemiol Psychiatr Sci Verona*. 2015; 24: 395–398. <http://dx.doi.org.ezp-prod1.hul.harvard.edu/10.1017/S2045796015000657>
33. Angermeyer MC, Holzinger A, Carta MG, Schomerus G. Biogenetic explanations and public acceptance of mental illness: Systematic review of population studies. *Br J Psychiatry*. 2011; 199: 367–372. <https://doi.org/10.1192/bjp.bp.110.085563> PMID: 22045945
34. Pescosolido BA, Martin JK, Long JS, Medina TR, Phelan JC, Link BG. “A disease like any other”? A decade of change in public reactions to schizophrenia, depression, and alcohol dependence. *Am J Psychiatry*. 2010; 167: 1321–1330. <https://doi.org/10.1176/appi.ajp.2010.09121743> PMID: 20843872
35. Stuart H. Reducing the stigma of mental illness. *Glob Ment Health*. 2016; 3: 1–14. <https://doi.org/10.1017/gmh.2016.11> PMID: 28596886
36. Angermeyer MC, Matschinger H, Carta MG, Schomerus G. Changes in the perception of mental illness stigma in Germany over the last two decades. *Eur Psychiatry*. 2014; 29: 390–395. <https://doi.org/10.1016/j.eurpsy.2013.10.004> PMID: 24321774
37. Angermeyer MC, Matschinger H, Schomerus G. Attitudes towards psychiatric treatment and people with mental illness: changes over two decades. *Br J Psychiatry*. 2013; 203: 146–151. <https://doi.org/10.1192/bjp.bp.112.122978> PMID: 23787060
38. American Psychological Association. Survey: Americans becoming more open about mental health [Internet]. 2019 May p. 2 [cited 2019 May 8]. Available from: <https://www.apa.org/news/press/releases/2019/05/mental-health-survey>
39. Evans-Lacko S, Malcolm E, West K, Rose D, London J, Rüsçh N, et al. Influence of Time to Change’s social marketing interventions on stigma in England 2009–2011. *Br J Psychiatry*. 2013; 202: s77–s88. <https://doi.org/10.1192/bjp.bp.113.126672> PMID: 23553699
40. Evans-Lacko S, London J, Japhet S, Rüsçh N, Flach C, Corker E, et al. Mass social contact interventions and their effect on mental health related stigma and intended discrimination. *BMC Public Health*. 2012; 12: 489. <https://doi.org/10.1186/1471-2458-12-489> PMID: 22742085
41. Stuart H, Arboleda-Florez J, Sartorius N. *Paradigms lost: Fighting stigma and the lessons learned*. New York City, NY, USA: Oxford University Press USA; 2012.
42. Committee on the Science of Changing Behavioral Health Social Norms, Board on Behavioral, Cognitive, and Sensory Sciences, Division of Behavioral and Social Sciences and Education, National Academies of Sciences, Engineering, and Medicine. *Ending discrimination against people with mental and substance use disorders: The evidence for stigma change* [Internet]. Washington, DC: National Academies Press; 2016 [cited 2019 May 20]. Available from: <http://www.nap.edu/catalog/23442>. <https://doi.org/10.17226/23442> PMID: 27631043
43. Knaak S, Modgill G, Patten SB. Key ingredients of anti-stigma programs for health care providers: A data synthesis of evaluative studies. *Can J Psychiatry*. 2014; 59: 19–26. <https://doi.org/10.1177/070674371405901S06> PMID: 25565698
44. Corrigan PW, Kubiak MA, Leonhard C, Lundin RK, Reinke RR. Examining two aspects of contact on the stigma of mental illness. *J Soc Clin Psychol*. 2004; 23: 377–389.
45. Goldman HH. Progress in the elimination of the stigma of mental illness. *Am J Psychiatry*. 2010; 167: 1289–1290. <https://doi.org/10.1176/appi.ajp.2010.10081174> PMID: 21041248
46. Schnittker J. An uncertain revolution: Why the rise of a genetic model of mental illness has not increased tolerance. *Soc Sci Med*. 2008; 67: 1370–1381. <https://doi.org/10.1016/j.socscimed.2008.07.007> PMID: 18703264
47. Lebowitz MS, Ahn W. Combining biomedical accounts of mental disorders with treatability information to reduce mental illness stigma. *Psychiatr Serv*. 2012; 63: 496–499. <https://doi.org/10.1176/appi.ps.201100265> PMID: 22388477
48. McGinty EE, Goldman HH, Pescosolido B, Barry CL. Portraying mental illness and drug addiction as treatable health conditions: Effects of a randomized experiment on stigma and discrimination. *Soc Sci Med*. 2015; 126: 73–85. <https://doi.org/10.1016/j.socscimed.2014.12.010> PMID: 25528557



49. Romer D, Bock M. Reducing the stigma of mental illness among adolescents and young adults: The effects of treatment information. *J Health Commun.* 2008; 13: 742–758. <https://doi.org/10.1080/10810730802487406> PMID: 19051111
50. Castro A, Farmer P. Understanding and addressing AIDS-related stigma: From anthropological theory to clinical practice in Haiti. *Am J Public Health.* 2005; 95: 53–59. <https://doi.org/10.2105/AJPH.2003.028563> PMID: 15623859
51. Chan B, Tsai A. Trends in HIV-related stigma in the general population during the era of antiretroviral treatment expansion: An analysis of 31 sub-Saharan African countries. *Open Forum Infect Dis.* 2015; 2: 558–564. <https://doi.org/10.1093/ofid/ofv133.280>
52. Tsai AC, Bangsberg DR, Bwana M, Haberer JE, Frongillo EA, Muzoora C, et al. How does antiretroviral treatment attenuate the stigma of HIV? Evidence from a cohort study in rural Uganda. *AIDS Behav.* 2013; 17: 2725. <https://doi.org/10.1007/s10461-013-0503-3> PMID: 23670710
53. Tsai AC, Bangsberg DR, Weiser SD. Harnessing poverty alleviation to reduce the stigma of HIV in sub-Saharan Africa. *PLoS Med.* 2013; 10: e1001557. <https://doi.org/10.1371/journal.pmed.1001557> PMID: 24319400
54. Tsai AC, Hatcher A, Bukusi E, Dworkin S, Cohen C, Weiser S, et al. A livelihood intervention to reduce the stigma of HIV in rural Kenya: Longitudinal qualitative study. *AIDS Behav.* 2017; 21: 248–260. <https://doi.org/10.1007/s10461-015-1285-6> PMID: 26767535
55. Farmer P, Léandre F, Mukherjee J, Gupta R, Tarter L, Kim JY. Community-based treatment of advanced HIV disease: Introducing DOT-HAART (directly observed therapy with highly active antiretroviral therapy). *Bull World Health Organ.* 2001; 79: 1145–1151. PMID: 11799447
56. Farmer P, Léandre F, Mukherjee JS, Claude MS, Nevil P, Smith-Fawzi MC, et al. Community-based approaches to HIV treatment in resource-poor settings. *Lancet.* 2001; 358: 404–409. [https://doi.org/10.1016/s0140-6736\(01\)05550-7](https://doi.org/10.1016/s0140-6736(01)05550-7) PMID: 11502340
57. Tsai AC, Bangsberg DR, Frongillo EA, Hunt PW, Muzoora C, Martin JN, et al. Food insecurity, depression and the modifying role of social support among people living with HIV/AIDS in rural Uganda. *Soc Sci Med.* 2012; 74: 2012–2019. <https://doi.org/10.1016/j.socscimed.2012.02.033> PMID: 22513248
58. Tsai AC, Kakuhiere B, Mushavi R, Vorechovska D, Perkins JM, McDonough AQ, et al. Population-based study of intra-household gender differences in water insecurity: reliability and validity of a survey instrument for use in rural Uganda. *J Water Health.* 2016; 14: 280–292. <https://doi.org/10.2166/wh.2015.165> PMID: 27105413
59. Takada S, Nyakato V, Nishi A, O'Malley AJ, Kakuhiere B, Perkins JM, et al. The social network context of HIV stigma: Population-based, sociocentric network study in rural Uganda. *Soc Sci Med.* 2019; 233: 229–236. <https://doi.org/10.1016/j.socscimed.2019.05.012> PMID: 31229909
60. Boysen GA, Morton J, Nieves T. Mental illness as a relationship dealbreaker. *Stigma Health.* Epub 2018 Nov 29. <https://doi.org/10.1037/sah0000157>
61. Link BG, Cullen FT, Frank J, Wozniak JF. The social rejection of former mental patients: Understanding why labels matter. *Am J Sociol.* 1987; 92: 1461–1500. <https://doi.org/10.1086/228672>
62. Link BG, Yang LH, Phelan JC, Collins PY. Measuring mental illness stigma. *Schizophr Bull.* 2004; 30: 511–541. <https://doi.org/10.1093/oxfordjournals.schbul.a007098> PMID: 15631243
63. Angermeyer MC, Schulze B, Dietrich S. Courtesy stigma. *Soc Psychiatry Psychiatr Epidemiol.* 2003; 38: 593–602. <https://doi.org/10.1007/s00127-003-0680-x> PMID: 14564387
64. Corrigan PW, Miller FE. Shame, blame, and contamination: A review of the impact of mental illness stigma on family members. *J Ment Health.* 2004; 13: 537–548. <https://doi.org/10.1080/09638230400017004>
65. Goffman E. *Stigma: Notes on the management of spoiled identity.* Englewood Cliffs, New Jersey: Prentice-Hall; 1963.
66. Perkins HW. College student misperceptions of alcohol and other drug use norms among peers: exploring causes, consequences, and implications for prevention programs. In: *Designing alcohol and other drug prevention programs in higher education: Bringing theory into practice.* Newton, MA: The Higher Education Center for Alcohol and Other Drug Prevention; 1997. p. 177–206.
67. Perkins HW, Meilman PW, Leichter JS, Cashin JR, Presley CA. Misperceptions of the norms for the frequency of alcohol and other drug use on college campuses. *J Am Coll Health.* 1999; 47: 253. <https://doi.org/10.1080/07448489909595656> PMID: 10368559
68. Perkins JM, Nyakato VN, Kakuhiere B, Mbabazi PK, Perkins HW, Tsai AC, et al. Actual versus perceived HIV testing norms, and personal HIV testing uptake: A cross-sectional, population-based study in rural Uganda. *AIDS Behav.* 2018; 22: 616–628. <https://doi.org/10.1007/s10461-017-1691-z> PMID: 28233075

69. Tsai AC, Kakuhikire B, Perkins JM, Vořechovská D, McDonough AQ, Ogburn EL, et al. Measuring personal beliefs and perceived norms about intimate partner violence: Population-based survey experiment in rural Uganda. *PLoS Med.* 2017; 14: e1002303. <https://doi.org/10.1371/journal.pmed.1002303> PMID: 28542176
70. Shibutani T. Reference groups as perspectives. *Am J Sociol.* 1955; 60: 562–569. [doi.org/10.1086/221630](https://doi.org/10.1086/221630)
71. Altman DG, Schulz KF, Moher D, Egger M, Davidoff F, Elbourne D, et al. The revised CONSORT statement for reporting randomized trials: Explanation and elaboration. *Ann Intern Med.* 2001; 134: 663. <https://doi.org/10.7326/0003-4819-134-8-200104170-00012> PMID: 11304107
72. Yelland LN, Salter AB, Ryan P. Performance of the modified Poisson regression approach for estimating relative risks from clustered prospective data. *Am J Epidemiol.* 2011; 174: 984–992. <https://doi.org/10.1093/aje/kwr183> PMID: 21841157
73. Zou G. A modified Poisson regression approach to prospective studies with binary data. *Am J Epidemiol.* 2004; 159: 702–706. <https://doi.org/10.1093/aje/kwh090> PMID: 15033648
74. Brant R. Assessing proportionality in the proportional odds model for ordinal logistic regression. *Biometrics.* 1990; 46: 1171–1178. <https://doi.org/10.2307/2532457> PMID: 2085632
75. Okello ES. Cultural explanatory models of depression in Uganda. Stockholm: Karolinska University Press; 2006.
76. Shah A, Wheeler L, Sessions K, Kuule Y, Agaba E, Merry SP. Community perceptions of mental illness in rural Uganda: An analysis of existing challenges facing the Bwindi Mental Health Programme. *Afr J Prim Health Care Fam Med.* 2017; 9. <https://doi.org/10.4102/phcfm.v9i1.1404> PMID: 29041798
77. Ssebunnya J, Kigozi F, Lund C, Kizza D, Okello ES. Stakeholder perceptions of mental health stigma and poverty in Uganda. *BMC Int Health Hum Rights.* 2009; 9: 5. <https://doi.org/10.1186/1472-698X-9-5> PMID: 19335889
78. van Duijl M, Kleijn W, de Jong J. Unravelling the spirits' message: A study of help-seeking steps and explanatory models among patients suffering from spirit possession in Uganda. *Int J Ment Health Syst.* 2014; 8: 24. <https://doi.org/10.1186/1752-4458-8-24> PMID: 24940355
79. Quinn N, Knifton L. Beliefs, stigma and discrimination associated with mental health problems in Uganda: Implications for theory and practice. *Int J Soc Psychiatry.* 2014; 60: 554–561. <https://doi.org/10.1177/0020764013504559> PMID: 24097841
80. Crabb J, Stewart RC, Kokota D, Masson N, Chabunya S, Krishnadas R. Attitudes towards mental illness in Malawi: a cross-sectional survey. *BMC Public Health.* 2012; 12: 541. <https://doi.org/10.1186/1471-2458-12-541> PMID: 22823941
81. Daniel M, Njau B, Mtuya C, Okello ES, Mushia D. Perceptions of mental disorders and help-seeking behaviour for mental health care within the Maasai community of northern Tanzania: An exploratory qualitative study. *East Afr Health Res J.* 2018; 2: 103–111.
82. Gureje O, Lasebikan VO, Ephraim-Oluwanuga O, Olley BO, Kola L. Community study of knowledge of and attitude to mental illness in Nigeria. *Br J Psychiatry.* 2005; 186: 436–441. <https://doi.org/10.1192/bjp.186.5.436> PMID: 15863750
83. Quinn N. Beliefs and community responses to mental illness in Ghana: The experiences of family carers. *Int J Soc Psychiatry.* 2007; 53: 175–188. <https://doi.org/10.1177/0020764006074527> PMID: 17472090
84. Shibre T, Negash A, Kullgren G, Kebede D, Alem A, Fekadu A, et al. Perception of stigma among family members of individuals with schizophrenia and major affective disorders in rural Ethiopia. *Soc Psychiatry Psychiatr Epidemiol.* 2001; 36: 299–303. <https://doi.org/10.1007/s001270170048> PMID: 11583460
85. Ohaeri JU, Fido AA. The opinion of caregivers on aspects of schizophrenia and major affective disorders in a Nigerian setting. *Soc Psychiatry Psychiatr Epidemiol.* 2001; 36: 493–499. <https://doi.org/10.1007/s001270170014> PMID: 11768847
86. Schomerus G, Schwahn C, Holzinger A, Corrigan PW, Grabe HJ, Carta MG, et al. Evolution of public attitudes about mental illness: A systematic review and meta-analysis: Evolution of public attitudes. *Acta Psychiatr Scand.* 2012; 125: 440–452. <https://doi.org/10.1111/j.1600-0447.2012.01826.x> PMID: 22242976
87. Gureje O, Olley BO, Ephraim-Oluwanuga O, Kola L. Do beliefs about causation influence attitudes to mental illness? *World Psychiatry.* 2006; 5: 104–107. PMID: 16946952
88. World Health Organization, editor. Member state profile: Uganda. *Mental health atlas 2017* [Internet]. Geneva, Switzerland: World Health Organization; 2018 [cited 2019 Jan 23]. Available from: [https://www.who.int/mental\\_health/evidence/atlas/profiles-2017/en/](https://www.who.int/mental_health/evidence/atlas/profiles-2017/en/).
89. Hall J, d'Ardenne P, Nsereko J, Kasujja R, Baillie D, Mpango R, et al. Mental health practitioners' reflections on psychological work in Uganda: exploring perspectives from different professions. *Br J Guid Couns.* 2014; 42: 423–435. <https://doi.org/10.1080/03069885.2014.886672>

90. Saxena S, Thornicroft G, Knapp M, Whiteford H. Resources for mental health: Scarcity, inequity, and inefficiency. *Lancet*. 2007; 370: 878–889. [https://doi.org/10.1016/S0140-6736\(07\)61239-2](https://doi.org/10.1016/S0140-6736(07)61239-2) PMID: 17804062
91. Link BG, Phelan JC. Conceptualizing stigma. *Annu Rev Sociol*. 2001; 27: 363–385. <https://doi.org/10.1146/annurev.soc.27.1.363>
92. Pescosolido BA, Martin JK. The stigma complex. *Annu Rev Sociol*. 2015; 41: 87–116. <https://doi.org/10.1146/annurev-soc-071312-145702> PMID: 26855471
93. Lucas JW, Phelan JC. Stigma and status: The interrelation of two theoretical perspectives. *Soc Psychol Q*. 2012; 75: 310–333. <https://doi.org/10.1177/0190272512459968> PMID: 25473142
94. Phelan JC, Lucas JW, Ridgeway CL, Taylor CJ. Stigma, status, and population health. *Soc Sci Med*. 2014; 103: 15–23. <https://doi.org/10.1016/j.socscimed.2013.10.004> PMID: 24507907
95. Takada S, Weiser SD, Kumbakumba E, Muzoora C, Martin JN, Hunt PW, et al. The dynamic relationship between social support and HIV-related stigma in rural Uganda. *Ann Behav Med*. 2014; 48: 26–37. <https://doi.org/10.1007/s12160-013-9576-5> PMID: 24500077
96. Tsai AC, Bangsberg DR, Kegeles SM, Katz IT, Haberer JE, Muzoora C, et al. Internalized stigma, social distance, and disclosure of HIV seropositivity in rural Uganda. *Ann Behav Med*. 2013; 46: 285–294. <https://doi.org/10.1007/s12160-013-9514-6> PMID: 23690283
97. Feldman DB, Crandall CS. Dimensions of mental illness stigma: What about mental illness causes social rejection? *J Soc Clin Psychol*. 2007; 26: 137–154. <https://doi.org/10.1521/jscp.2007.26.2.137>
98. Finch J. The vignette technique in survey research. *Sociology*. 1987; 21: 105–114. <https://doi.org/10.1177/0038038587021001008>
99. Turan JM, Elafros MA, Logie CH, Banik S, Turan B, Crockett KB, et al. Challenges and opportunities in examining and addressing intersectional stigma and health. *BMC Med*. 2019; 17: 7. <https://doi.org/10.1186/s12916-018-1246-9> PMID: 30764816
100. Goodyear K, Haass-Koffler CL, Chavanne D. Opioid use and stigma: The role of gender, language and precipitating events. *Drug Alcohol Depend*. 2018; 185: 339–346. <https://doi.org/10.1016/j.drugalcdep.2017.12.037> PMID: 29499554
101. Wirth JH, Bodenhausen GV. The role of gender in mental-illness stigma: A national experiment. *Psychol Sci*. 2009; 20: 169–173. <https://doi.org/10.1111/j.1467-9280.2009.02282.x> PMID: 19175755
102. Kennedy-Hendricks A, McGinty EE, Barry CL. Effects of competing narratives on public perceptions of opioid pain reliever addiction during pregnancy. *J Health Polit Policy Law*. 2016; 41: 873–916. <https://doi.org/10.1215/03616878-3632230> PMID: 27256811
103. Henderson C, Evans-Lacko S, Flach C, Thornicroft G. Responses to mental health stigma questions: the importance of social desirability and data collection method. *Can J Psychiatry Rev Can Psychiatr*. 2012; 57: 152–160. <https://doi.org/10.1177/070674371205700304> PMID: 22398001
104. Krumpal I. Determinants of social desirability bias in sensitive surveys: a literature review. *Qual Quant*. 2013; 47: 2025–2047. <https://doi.org/10.1007/s11135-011-9640-9>
105. Barry CL, McGinty EE, Pescosolido BA, Goldman HH. Stigma, discrimination, treatment effectiveness, and policy: Public views about drug addiction and mental illness. *Psychiatr Serv*. 2014; 65: 1269–1272. <https://doi.org/10.1176/appi.ps.201400140> PMID: 25270497
106. Schomerus G, Lucht M, Holzinger A, Matschinger H, Carta MG, Angermeyer MC. The stigma of alcohol dependence compared with other mental disorders: A review of population studies. *Alcohol Alcohol*. 2011; 46: 105–112. <https://doi.org/10.1093/alcalc/agg089> PMID: 21169612
107. Schomerus G, Matschinger H, Angermeyer MC. Continuum beliefs and stigmatizing attitudes towards persons with schizophrenia, depression and alcohol dependence. *Psychiatry Res*. 2013; 209: 665–669. <https://doi.org/10.1016/j.psychres.2013.02.006> PMID: 23465293
108. Rost K, Smith GR, Taylor JL. Rural-urban differences in stigma and the use of care for depressive disorders. *J Rural Health*. 1993; 9: 57–62. <https://doi.org/10.1111/j.1748-0361.1993.tb00495.x> PMID: 10124199
109. Jones AR, Cook TM, Wang J. Rural–urban differences in stigma against depression and agreement with health professionals about treatment. *J Affect Disord*. 2011; 134: 145–150. <https://doi.org/10.1016/j.jad.2011.05.013> PMID: 21665289
110. Tsai AC, Venkataramani AS. The causal effect of education on HIV stigma in Uganda: evidence from a natural experiment. *Soc Sci Med*. 2015; 142: 37–46. <https://doi.org/10.1016/j.socscimed.2015.08.009> PMID: 26282707
111. Friedrich B, Evans-Lacko S, London J, Rhydderch D, Henderson C, Thornicroft G. Anti-stigma training for medical students: The Education Not Discrimination project. *Br J Psychiatry*. 2013; 202: s89–s94. <https://doi.org/10.1192/bjp.bp.112.114017> PMID: 23553700
